# Supplementary material for: Validation of an Automated Cardiothoracic Ratio Calculation for Hemodialysis Patients
Source: MDPI journal article supplement (doi:10.3390/diagnostics13081376), 2023-04-09
Supplement: s1 [file s1]

Article

# Validation of an Automated Cardiothoracic Ratio Calculation for Hemodialysis Patients

## Supplementary Materials:

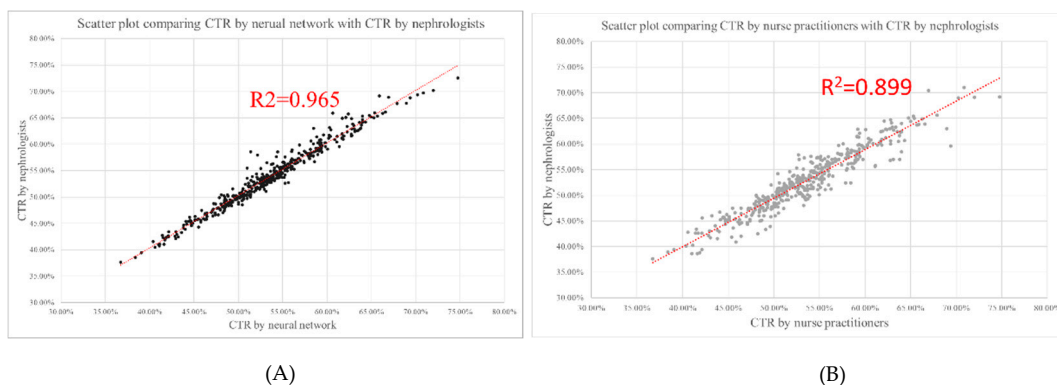

Supplement Figure S1. (A) scatter plot comparing CTR by neural network with CTR by nephrologists. (B) Scatter plot comparing CTR by nurse practitioners with CTR by nephrologists.

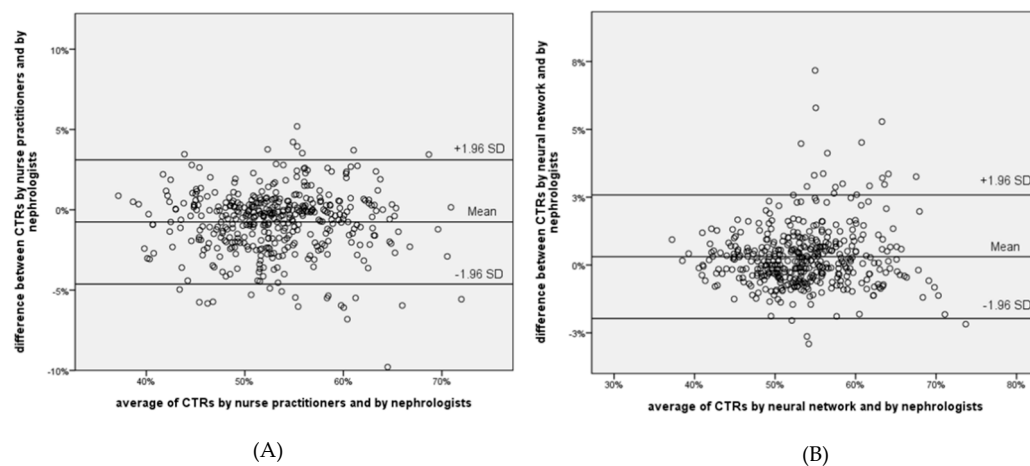

Supplement Figure S2. (A) Bland-Altman plot of CTRs by nurse practitioners and by nephrologists (B) Bland-Altman plot of CTRs by neural network and by nephrologists

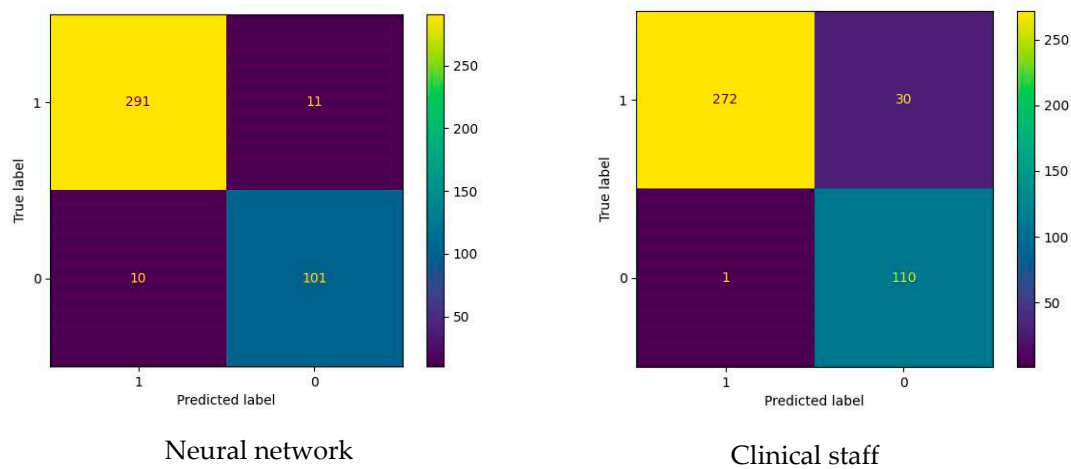

Supplemental Figure S3. Confusion matrix: 1.Left, Neural network vs. nephrologist: accuracy 94.92%, sensitivity 96.36%, specificity 90.99%. 2.Right, Clinical staff vs. nephrologist: accuracy 92.49%, sensitivity 90.07%, specificity 99.10%

| Reference          | Model                               | Dice coefficient | IoU   | R <sup>2</sup> |
|--------------------|-------------------------------------|------------------|-------|----------------|
| Chamveha et al.[1] | Unt (VGG-16)                        | 0.97             | N.A.  | N.A.           |
| Solovyev et al.[2] | Feature Pyramid Network (Resnet-50) | 0.915            | 0.845 | 0.903          |
| Eslami et al.[3]   | Pix2pix                             | 0.985            | N.A.  | N.A.           |
| Our method         | AlbuNet-34                          | 0.974            | 0.95  | 0.965          |

Supplemental Table S1 Comparison of Dice coefficient with the other articles.
